# Decoding the silence: Neural bases of zero pronoun resolution in Chinese

Shulin Zhang

University of Georgia

Jixing Li

New York University Abu Dhabi

Yiming Yang

Jiangsu Normal University

John Hale

University of Georgia

## Abstract

Chinese is one of many languages that can drop subjects. We report an fMRI study of language comprehension processes in these “zero pronoun” cases. The fMRI data come from Chinese speakers who listened to an audiobook. We conducted both univariate GLM and multivariate pattern analysis (MVPA) on these data time-locked to each verb with a zero pronoun subject. We found increased left middle temporal gyrus activity for zero pronouns compared to overt subjects, suggesting additional effort searching for an antecedent during zero pronoun resolution. MVPA further revealed that the intended referent of a zero pronoun seems to be physically represented in the Precuneus and the Parahippocampal Gyrus shortly after its presentation. This highlights the role of memory and discourse-level processing in resolving referential expressions, including unspoken ones, in naturalistic language comprehension.

*Keywords:* zero pronoun, pro-drop, Chinese, MVPA, fMRI, left middle temporal gyrus, Precuneus

## 1 Introduction

Our ability to ascertain which entity a pronoun refers to is a central part of human language understanding. Many East Asian languages, such as Mandarin Chinese, pronouns can be freely omitted in both subject and object positions given proper discourse context (Huang, 1989). This phenomenon of “zero pronoun resolution” has been extensively studied in formal linguistics (e.g., Barbosa, 2011, 2019; Bi & Jenks, 2019; C. N. Li & Thompson, 1976; Neeleman & Szendrői, 2007; Song, 2005), yet its neural bases are barely discussed, especially with naturalistic stimuli that can reveal language processes at the discourse level. Here we report the results of the first fMRI study to examine the brain regions involved in zero pronoun processing while Chinese participants listen to a naturalistic narrative.

The status of zero pronouns as the deleted counterparts of regular pronouns is debated in formal linguistics. While some assumed that null pronouns are overt pronouns that fail to be realized at the phonological interface (e.g., Neeleman & Szendrői, 2007), others suggested that null pronouns are derived from semantically distinct noun phrases (Bi & Jenks, 2019). From a cognitive perspective, zero pronouns are the “missing spots” in texts and speech, and they constitute a “harder” case for pronoun resolution as they offer no phonological or morpho-syntactic information. By comparing brain activity during the processing of zero and non-zero

18 arguments, we aim to better understand the neural mechanisms involved in understanding  
19 unpronounced pronouns in *pro*-drop languages.

## 20 **1.1 Brain regions involved in reference processing**

21 While no prior neuroimaging study has directly investigated zero pronoun processing, there are  
22 some fMRI and MEG studies on referential processing in general (Brodbeck & Pylkkänen, 2017;  
23 Brodbeck et al., 2016; Hammer et al., 2007; J. Li et al., 2021; Matchin et al., 2014; Nieuwland et al.,  
24 2007; Santi & Grodzinsky, 2012). However, no consensus has been reached on the neural corre-  
25 lates for pronoun processing. In addition, previous studies adopted different task manipulations,  
26 making it unclear whether they tapped the same cognitive processes. For example, Nieuwland  
27 et al. (2007) compared the BOLD responses when participants read sentences containing a “refer-  
28 entially failing pronoun” (e.g., “Rose told Emily that *he* had a positive attitude towards life.”)  
29 or a coherent pronoun (e.g., “Ronald told Emily that *he* had a positive attitude towards life.”).  
30 Nieuwland et al. showed that referentially failing pronouns were associated with increased  
31 activation in the medial parietal regions and bilateral inferior parietal regions, possibly reflecting  
32 morpho-syntactic processing. Hammer et al. (2007) manipulated the syntactic gender matching  
33 between the antecedent and pronouns using German sentences and found that gender incon-  
34 gruency elicited the bilateral Inferior Frontal Gyrus (IFG), the left Medial Frontal Gyrus (MFG),  
35 and the bilateral Supramarginal/Angular Gyrus compared to congruent pronoun-antecedent  
36 pairs. Hammer et al. (2011) further investigated the possible interactions between gender and  
37 distance between the antecedents and the pronoun. The results showed a fronto-temporal  
38 network including the bilateral IFG, the Superior Temporal Gyrus (STG), and posterior Middle  
39 Temporal Gyrus (pMTG) for long-distance conditions, with the pMTG additionally driven by  
40 syntactic gender violation. These authors suggested that the temporal regions are sensitive to the  
41 morpho-syntactic information of the antecedents since the long distance between the antecedent  
42 and the pronoun increased the overall syntactic complexity of the sentence. Matchin et al. (2014)  
43 also examined the effect of distance but with the backward anaphora/filler-gap dependencies  
44 contrast. Matchin and colleagues observed specific activity in the bilateral Anterior Temporal  
45 Lobes (ATLs), the bilateral Angular Gyrus (AGs), and the left Precuneus activity during the  
46 processing of backward anaphora compared to *wh*-fillers. Santi & Grodzinsky (2012) compared  
47 null pronouns, a parasitic-gap and a *wh*-trace in English sentences such as “[Which paper] did

48 the tired student submit [*wh*-trace] after reviewing [parasitic gap/*it*]?" The results showed  
49 increased activity in the right Middle Frontal Gyrus (MFG), the left Ventral Precentral Sulcus,  
50 and the Left Supramarginal Gyrus for pronouns compared to parasitic gaps.

51 In addition to the morpho-syntactic manipulations, Brodbeck & Pylkkänen (2017) and  
52 Brodbeck et al. (2016) used a visual world paradigm in magnetoencephalography (MEG) and  
53 found medial parietal activity in cases of successful reference resolution. More relevant to the  
54 current study is J. Li et al.'s (2021) study on third person pronoun processing using the same  
55 naturalistic listening paradigm. In both fMRI and MEG, Li et al. found that the left middle  
56 temporal gyrus (LMTG) is consistently activated for third person pronoun processing in both  
57 English and Chinese. Yet they also found additional medial parietal activity from the MEG  
58 data, consistent with Brodbeck & Pylkkänen (2017), Brodbeck et al. (2016), and Nieuwland et al.  
59 (2007).

60 To sum up, referential processing has been implicated in a number of regions, including  
61 the medial parietal lobe. Zero pronoun resolution, as a special case of referential processing, is  
62 expected to involve similar brain regions.

## 63 1.2 Zero pronouns in Chinese

64 As a "radical *pro*-drop" language, Chinese can have a null pronoun as the subject or object of a  
65 tense clause in appropriate contexts. Unlike ordinary "*pro*-drop" languages, such as Spanish and  
66 Italian, that exhibit rich verbal agreement systems, Chinese does not have verbal inflections that  
67 provide person or gender information to help recover the omitted pronouns (See (1), data from  
68 Huang (1989)). Instead, in Chinese, zero pronouns and their overt coreferential noun phrases  
69 form a topic chain structure, a discourse structure that enables covert as well as overt coreference  
70 (Kun, 2019; W. Li, 2004; Shi, 1993).

- (1) "Zhangsan kanjian Lisi le ma?" ("Did Zhangsan see Lisi?")
  - a. "Ta kanjian ta le." ("He saw him.")
  - b. "[ ] kanjian ta le." ("[He] saw him.")
  - c. "Ta kanjian [ ] le." ("He saw [him].")
  - d. "[ ] kanjian [ ] le." ("[He] saw [him].")

71 A topic chain is a chain of clauses sharing an identical topic that occurs overtly once in

72 one of the clauses, and its boundary may cross several sentences and even paragraphs (W. Li,  
73 2004). The topic chain can integrate information from multiple clauses (Kun, 2019), which makes  
74 long-distance coreference between zero pronouns and overt noun phrases possible. We can  
75 understand coreference resolution as searching for an appropriate antecedent in the topic chain.  
76 This searching process likely recruits memory and discourse-related brain regions.

77 The existence of the topic chain, coupled with the lack of morphological markers, makes  
78 zero pronoun resolution a “harder” case of pronoun resolution in Chinese, such that additional  
79 cognitive resources may be needed to recover the omitted arguments. We would expect the  
80 involvement of brain regions related to discourse-level processing in Chinese zero pronoun  
81 resolution, and higher brain activation level compared with overt noun phrases.

### 82 **1.3 Current study**

83 The current study examines which brain regions are responsible for the processing of the dropped  
84 pronouns in Chinese. We compared brain activity time-locked to zero and non-zero subjects  
85 during naturalistic listening. Since zero pronouns are not pronounced in the speech, we marked  
86 the onsets of the main verbs that follow either a zero or an overt subject as the time point where  
87 the zero/non-zero argument occurs (See Section 2.2 for details on the annotation steps).

88 In a mass univariate analysis with a General Linear Model (GLM), we show that zero  
89 pronoun resolution demands higher activity in anterior as well as posterior LMTG, compared  
90 to overt reference resolution (See Section 3.1). Given the LMTG’s role in pronoun resolution  
91 (Hammer et al., 2007, 2011; J. Li et al., 2021, e.g.), our results suggest that zero pronoun resolution  
92 evokes additional effort expended in the search for an antecedent. With searchlight-based  
93 Multivariate Pattern Analysis (MVPA), we identify a network that includes the Precuneus and  
94 Parahippocampal Gyrus, which are regarded as part of the “extended” language network,  
95 compared to the “core” language network including brain regions such as the temporal lobe  
96 (Fedorenko et al., 2011; Ferstl et al., 2008; Xiong & Newman, 2021). These results suggest that  
97 brain regions beyond the “core” language network subserve zero pronoun resolution in Chinese.

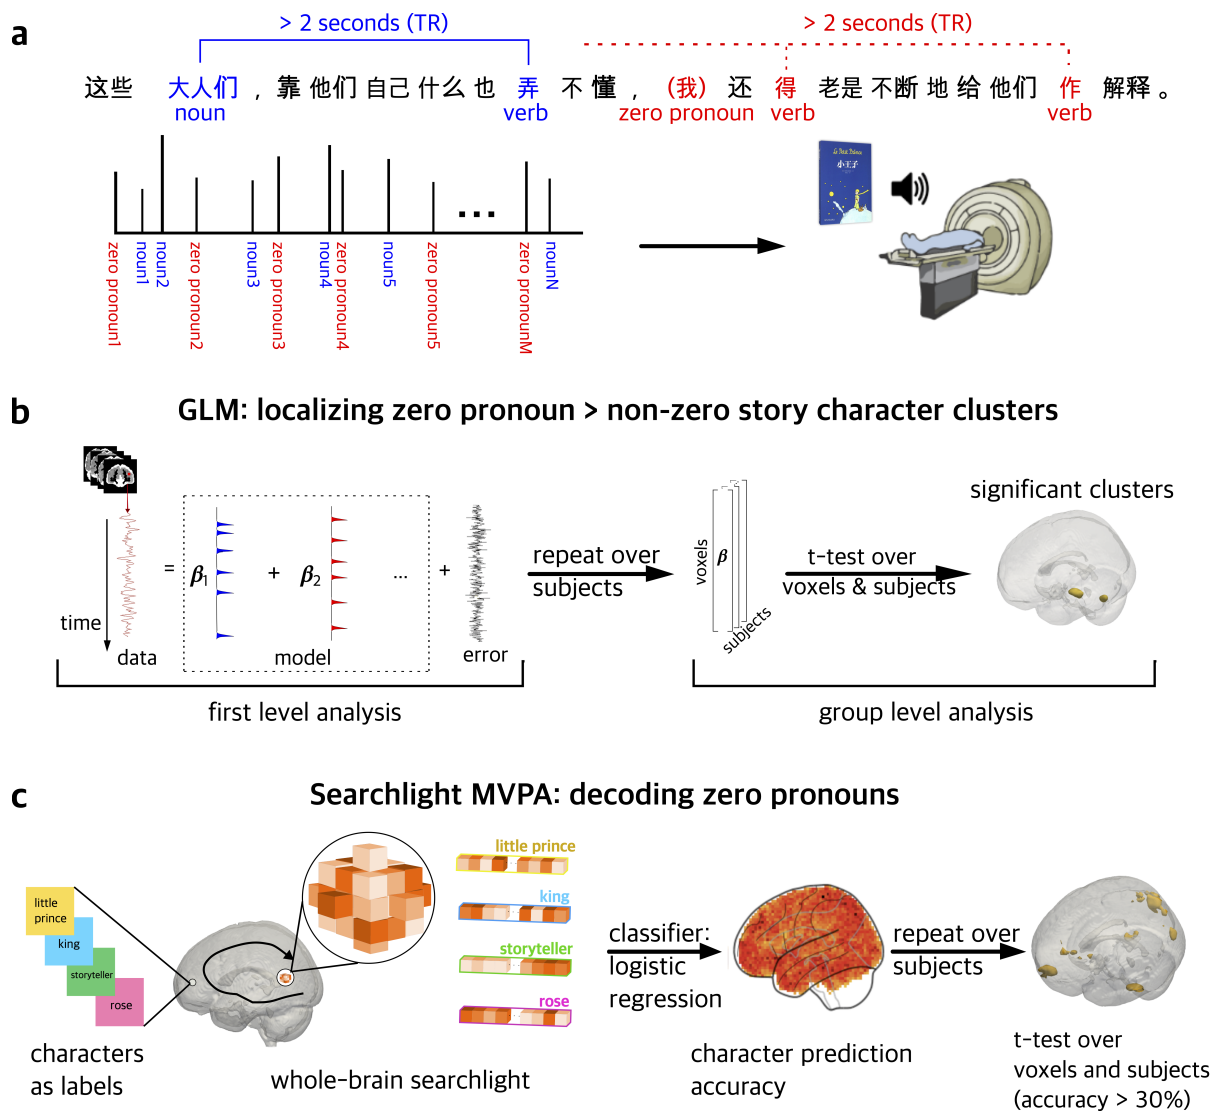

**Figure 1:** Schematic illustration of the analysis procedure. **a.** Stimuli and fMRI data collection. fMRI data were collected while Chinese native speakers were listening to a naturalistic audiobook. Zero pronouns and Non-zero nouns in subject position are annotated by Chinese native speakers, and their corresponding main verbs were taken as timestamps for GLM and MVPA analyses. The distance between a zero or non-zero noun to its main verb was controlled to be longer than 2 seconds so that they cannot be in the same fMRI scan. **b.** Two-stage General Linear Model analyses. At the first stage, a general linear model was fitted to each participants' fMRI data, and the regressors used in the model include audio sound pressure, word frequency, zero-pronoun feature, non-zero noun feature (See Section 2.5). At the second stage, a *t*-test was performed on the distribution of  $\beta$  values across subjects and voxels, and the significant clusters were retrieved with  $p < .05$  FWE and  $k > 20$ . **c.** Whole-brain searchlight multivariate pattern analysis. Among all annotated zero pronouns, four story characters' (See Section 2.6) main verb scans were used in the MVPA decoding analyses. A logistic regression classifier was used to derive an average accuracy value for decodability of the four story characters, based on an *N*-voxel neighborhood. T-tests were performed on these accuracy values across subjects to identify clusters with above-chance accuracy. ( $p < .001$  FWE and  $k > 50$ ).

## 98 **2 Material and methods**

### 99 **2.1 Participants**

100 Participants were 35 healthy, right-handed, young adults (15 female, mean age=19.3, range  
101 = 18-25). They self-identified as native Chinese speakers and had no history of psychiatric,  
102 neurological, or other medical illness that could compromise cognitive functions. All participants  
103 were paid for and gave written informed consent prior to participation, in accordance with the  
104 guidelines of the Ethics Committee at Jiangsu Normal University.

### 105 **2.2 Stimuli and annotations**

106 The stimuli is a Chinese translation (xiaowangzi.org, 2021) of Saint-Exupéry's *The Little Prince*.  
107 To annotate zero and non-zero subjects, we first located all verbs (i.e., "VV"s) in the text using  
108 ZPar (Zhang & Clark, 2011). We then annotated each verb as Zero or Non-zero based on whether  
109 it has an overtly pronounced subject. For example, as shown in Figure 1a, the verb phrase (VP)  
110 "弄不懂 (make no understanding)" is marked as non-zero as its subject "大人们 (grown-ups)"  
111 is overt; the VP "做解释 (make explanations)" is marked as "zero" since its subject "我 (I)" is  
112 omitted.

### 113 **2.3 Procedure**

114 After giving their informed consent, participants were familiarized with the MRI facility and  
115 assumed a supine position on the scanner. The presentation script was written in PsychoPy 2  
116 (Peirce, 2007). Auditory stimuli were delivered through MRI-safe, high-fidelity headphones (Ear  
117 Bud Headset, Resonance Technology, Inc, California, USA) inside the head coil. The headphones  
118 were secured against the plastic frame of the coil using foam blocks. An experimenter increased  
119 the sound volume stepwise until the participants could hear clearly.

120 The Chinese audiobook lasted for about 99 minutes and was divided into nine sections,  
121 each lasted for about ten minutes. Participants listened passively to the nine sections and  
122 completed four quiz questions after each section (36 questions in total). These questions were  
123 used to confirm their comprehension and were viewed by the participants via a mirror attached  
124 to the head coil and they answered through a button box. The entire session lasted for around  
125 2.5 hours.

## 126 2.4 fMRI data collection and preprocessing

127 MRI images were acquired with a 3T MRI GE Discovery MR750 scanner with a 32-channel  
128 head coil. Anatomical scans were acquired using a T1-weighted volumetric Magnetization  
129 Prepared RApid Gradient-Echo (MP-RAGE) pulse sequence. Functional scans were acquired  
130 using a multi-echo planar imaging (ME-EPI) sequence with online reconstruction (TR=2000  
131 ms; TEs=12.8, 27.5, 43 ms; FA=77°; matrix size=72 x 72; FOV=240.0 mm x 240.0 mm; 2 x image  
132 acceleration; 33 axial slices, voxel size=3.75 x 3.75 x 3.8 mm). Cushions and clamps were used to  
133 minimize head movement during scanning.

134 All fMRI data were preprocessed using AFNI version 16 (Cox, 1996). The first 4 volumes  
135 in each run were excluded from analyses to allow for T1-equilibration effects. Multi-echo  
136 independent components analysis (ME-ICA) (Kundu et al., 2012) was used to denoise data  
137 for motion, physiology, and scanner artifacts. Images were then spatially normalized to the  
138 standard space of the Montreal Neurological Institute (MNI) atlas, yielding a volumetric time  
139 series resampled at 2 mm cubic voxels.

## 140 2.5 GLM analysis

141 A whole-brain GLM analysis was conducted to localize the brain regions involved in zero and  
142 non-zero reference resolution. We modeled the timecourse of each voxel's BOLD signals for each  
143 of the nine sections by a binary zero pronoun regressor and a binary non-zero subject regressor,  
144 time-locked to the onset of the verb for the zero subject (510 cases) and non-zero subject (1942  
145 cases) in the audiobook. We included three control variables: the root mean square intensity  
146 (*RMS intensity*) for every 10 ms of each audio section, the binary regressor time-locked to the  
147 offset of each word in the audio (*word rate*), and the unigram frequency of each word (*frequency*),  
148 estimated using Google ngrams (Version 20120701) and the SUBTLEX corpora for Chinese (Cai  
149 & Brysbaert, 2010). These regressors were convolved with SPM12's (Penny et al., 2011) canonical  
150 HRF function and matched the scan numbers of each section. (See Supplementary Figure 5  
151 for the correlation matrix of the regressors, and Supplementary Figure 4 for a visualization of  
152 the regressors.) At the group level, the contrast images for zero and non-zero subjects were  
153 examined by a factorial design matrix. An 8 mm full-width at half-maximum (FWHM) Gaussian  
154 smoothing kernel was applied on the contrast images from the first-level analysis to counteract  
155 inter-subject anatomical variation. Significant clusters were thresholded at  $p < .05$  FWE with



156 cluster size of  $k > 20$ . The GLM analysis was performed with the python package nilearn (0.7.0)  
157 (Abraham et al., 2014).

## 158 2.6 MVPA for zero pronoun resolution

159 A whole-brain searchlight MVPA was performed to discriminate patterns of activation pertaining  
160 to the omitted story characters. The fMRI scans which contain both a zero pronoun and its  
161 previous overtly pronounced antecedent are excluded from the MVPA. We selected the four  
162 most frequent story characters for the classification, and there were 188 zero-pronoun instances  
163 used in MVPA, including: “小王子 (the little prince)”, 84 instances; “我 (I/the storyteller)”, 67  
164 instances; “国王 (the king)”, 25 instances; “花 (the rose)”, 12 instances.

165 Searchlight MVPA identifies voxels where the pattern of activation in its local neighbor-  
166 hood can discriminate between conditions (i.e. story characters). For each subject, a spherical  
167 ROI (radius = 8 mm) centered in turn on each voxel in the brain scans time-locked to 5 seconds  
168 after the zero pronouns’ presentation. A 5-second delay serves to capture BOLD signals at  
169 approximately the peak of their hemodynamic response to the zero pronouns. Each vector  
170 contains all the voxels in each sphere without feature selection. A logistic regression classifier  
171 was trained to differentiate the vectors of all four story characters. A 3-fold cross-validation  
172 process was adopted in the training process, which means 2/3 of the original labeled data were  
173 used as a training dataset, and the rest as a testing set. Prediction accuracy was averaged over  
174 the three testing results.

175 This whole process was repeated for the sphere centered by each voxel for each subject.  
176 The resulting maps contain each voxel’s decoding accuracy for each subject. Higher accuracy  
177 indicates better performance on decoding the reference of the zero pronouns. At the group level,  
178 a *t*-test was conducted for all voxels across all subjects. Voxels with an accuracy higher than  
179 30% (higher than the chance baseline 25%<sup>1</sup>) were highlighted. Family-wise error correction was  
180 applied with an alpha level of  $<.001$  and an adequate cluster size of  $k > 50$ . The MVPA analysis  
181 was performed using the python packages nilearn (0.7.0) (Abraham et al., 2014), and scikit-learn

---

<sup>1</sup>The empirical distribution of references to story characters in pro-drop contexts is unbalanced as expected in naturalistic texts (See Section 2.6 for details). To help interpret accuracy levels, weighted logistic regression was applied in MVPA such that examples were weighted according to the prevalence of each class in the training data (This was realized by the scikit-learn (Pedregosa et al., 2011) `class_weight= “balanced”` option). The average accuracy from guessing randomly according to the empirical distribution in this weighted problem is 25%.

182 (Pedregosa et al., 2011).

183 To characterize chance performance, we carried out another MVPA analysis on a scram-  
184 bled dataset where story character labels were assigned randomly. In this supplementary  
185 analysis, a story character label randomly selected out of the four story characters was assigned  
186 to each zero pronoun, and the same MVPA analysis steps introduced above were conducted to  
187 test whether there are brain regions able to decode randomly assigned labels.

### 188 3 Results

#### 189 3.1 GLM: Localizing brain regions for zero pronoun processing

190 The contrast between zero pronouns and overt references to story characters revealed signif-  
191 icantly higher activity in the anterior and posterior LMTGs ( $p < .001$  FWE, peak  $t$ -value =  
192 6.02, cluster size = 680 mm<sup>3</sup> and  $p < .001$  FWE, peak  $t$ -value = 5.87, cluster size = 1344 mm<sup>3</sup>,  
193 respectively; see Figure 2a,b). The MNI coordinates for the peak of each cluster are shown in  
194 Figure 2c. No significant cluster was found for the opposite contrast, i.e. Non-zero > Zero.

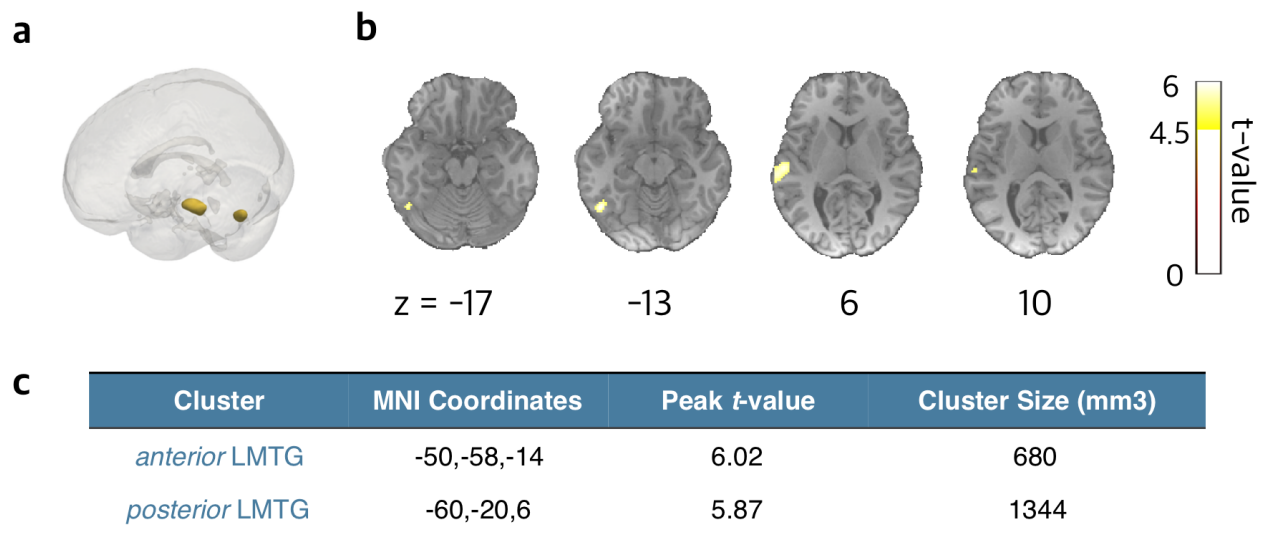

**Figure 2:** GLM results for the contrast between zero and non-zero reference resolution. **a** Whole-brain view on a 3D brain. **b** Coronal slices of significant clusters **c** MNI coordinates, cluster size and their peak level statistics, thresholded at  $p < .05$  FWE and  $k > 20$ .

#### 195 3.2 MVPA: Decoding references of zero pronouns

196 Searchlight MVPA results are shown in Figure 3. Brain regions with a decoding accuracy greater  
197 than 30% for the zero pronouns include the Precuneus (the right Precuneus:  $p < .001$  FWE,

198 peak  $t$ -value = 12.9, cluster size = 3027 mm<sup>3</sup>; the left Precuneus:  $p < .001$  FWE, peak  $t$ -value  
 199 = 11.78, cluster size = 5676 mm<sup>3</sup>), the LMFG ( $p < .001$  FWE, peak  $t$ -value = 11.76, cluster size  
 200 = 1608 mm<sup>3</sup>), the right Interior Temporal Gyrus (RITG;  $p < .001$  FWE, peak  $t$ -value = 11.15,  
 201 cluster size = 2176 mm<sup>3</sup>), the LAG ( $p < .001$  FWE, peak  $t$ -value = 10.78, cluster size = 1955 mm<sup>3</sup>),  
 202 the LMTG ( $p < .001$  FWE, peak  $t$ -value = 10.55, cluster size = 2522 mm<sup>3</sup>), the left Frontal Pole  
 203 ( $p < .001$  FWE, peak  $t$ -value = 10.29, cluster size = 2680 mm<sup>3</sup>), the RAG ( $p < .001$  FWE, peak  
 204  $t$ -value = 10.01, cluster size = 1671 mm<sup>3</sup>), and the right Parahippocampal Gyrus ( $p < .001$  FWE,  
 205 peak  $t$ -value = 9.27, cluster size = 2712 mm<sup>3</sup>).

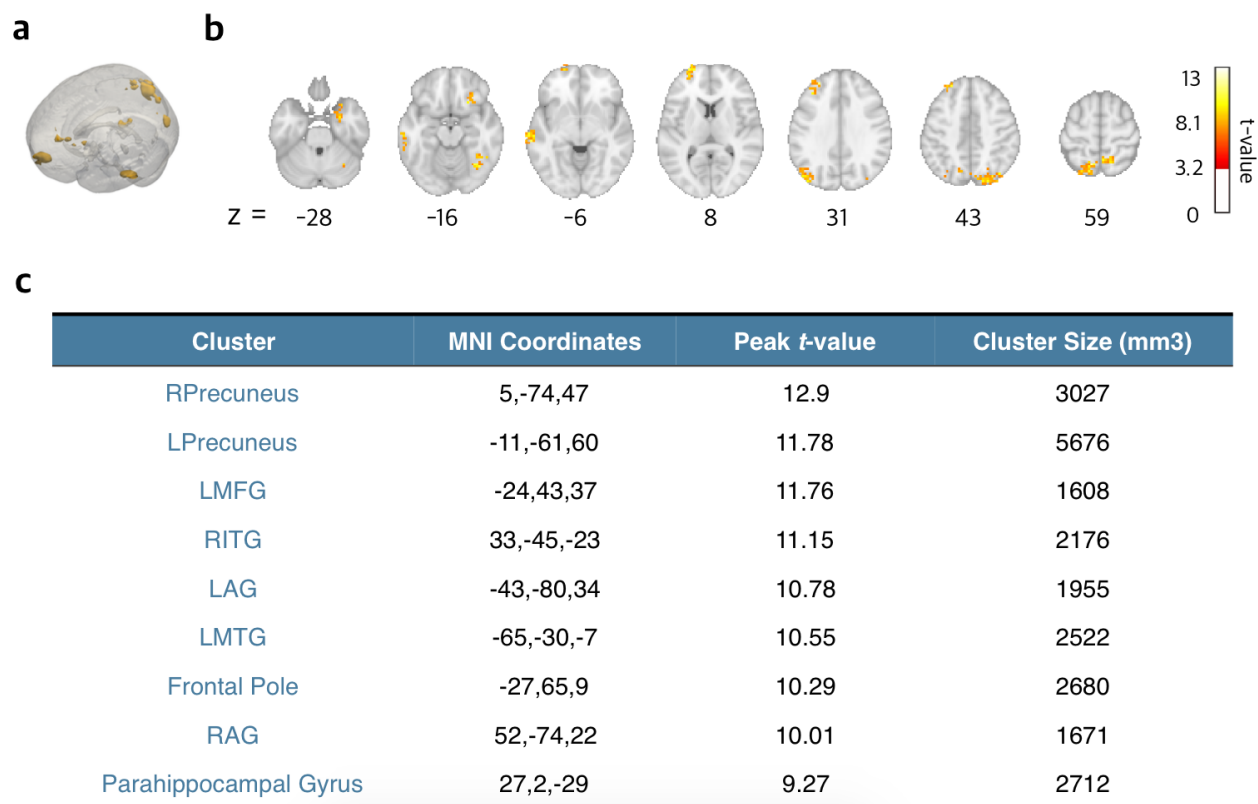

**Figure 3:** MVPA results for brain regions with decoding accuracy significantly higher than 30%. **a** Whole-brain view on a 3D brain. **b** Coronal slices of significant clusters **c** MNI coordinates, cluster size and their peak level statistics, thresholded at  $p < .001$  FWE and  $k > 50$ .

206 Both the GLM and MVPA results implicate the LMTG. Not only did the LMTG show  
 207 higher activity for zero pronoun resolution compared to non-zero reference resolution, but also  
 208 showed high story character decoding accuracy for story characters. MVPA further revealed a  
 209 network for decoding zero pronouns, including the Precuneus, the LAG, the frontal pole, the  
 210 LMFG, and the Parahippocampal Gyrus.

### 211 **3.3 Scrambled MVPA: Decoding zero pronouns with randomly assigned story character** 212 **labels**

213 When the correct story character labels are replaced by randomly assigned story character labels,  
214 no significant brain region was detected from the MVPA results ( $p < .001$  FWE, cluster size  
215  $> 50$ ). The null result with randomly-assigned label supports the idea that the main MVPA  
216 analysis in Section 3.2 in fact does identify brain regions where story character information is  
217 represented.

## 218 **4 Discussion**

219 This study examines the neural bases of zero pronoun resolution in Chinese. Chinese is especially  
220 suitable for studying zero pronoun resolution as it does not have verbal inflections that could  
221 interfere with zero pronoun resolution at the phonological and morpho-syntactic levels. The  
222 GLM results show increased LMTG activity during zero pronoun resolution compared to non-  
223 zero reference processing. MVPA results further reveal a network of activity including the  
224 Precuneus and the Parahippocampal Gyrus in addition to the “core” language network. The  
225 results suggest that zero pronoun resolution involves additional effort in the search of an  
226 antecedent compared to regular noun phrases. Both “core” and “extended” nodes of the language  
227 network appear to contribute to resolving the reference of zero pronouns.

### 228 **4.1 LMTG for retrieving the antecedents during zero pronoun resolution**

229 Both anterior and posterior regions within the LMTG showed significantly higher activity for  
230 zero pronouns compared to overt references to story characters. In previous studies, the LMTG  
231 has been shown to play an essential role in language comprehension (Dronkers et al., 2011;  
232 Matchin & Hickok, 2020). The LMTG has also been associated with biological and syntactic  
233 gender processing (Heim et al., 2002; Hammer et al., 2007, 2011; Miceli et al., 2002) during  
234 pronoun processing. For example, Hammer et al. (2007) showed that German sentences with  
235 congruent biological and syntactic gender evoked higher activity in the LMTG; Miceli et al.  
236 (2002) found increased LMTG activity when the subjects were asked whether a written noun  
237 has a masculine or feminine gender. However, J. Li et al. (2021) using the same naturalistic  
238 paradigm in fMRI, showed that the LMTG is also implicated for pronoun processing in Chinese.  
239 In addition, P. Li et al. (2004) showed a number of brain regions including the LMTG during a

240 lexical-judgement task while Chinese participants saw nouns, verbs, and noun/verb-ambiguous  
241 words, supporting the LMTG's role in lexical representation. Ferstl et al.'s (2008) meta-analysis  
242 for the language network further suggests that the LMTG contributes to the comprehension of  
243 coherence, and shows stable significant results as part of the "core" language network.

244 In the context of this existing evidence regarding LMTG's role in morpho-syntactic match-  
245 ing and discourse coherence, increased LMTG activity for zero pronouns in the current study  
246 could reflect the greater difficulty of a reference-resolution problem in zero pronoun cases that  
247 lack phonological as well as morpho-syntactic information.

## 248 **4.2 The neural network for zero pronoun resolution**

249 Whole-brain searchlight-based MVPA revealed a network of brain regions implicated in the  
250 comprehension of reference to story characters, including the bilateral Precuneus, the bilateral  
251 AG, the left Frontal Pole, the LMFG, the LMTG, the RITG, and the right Parahippocampal Gyrus  
252 (See Figure 3).

253 The Precuneus has been previously related to "extra-linguistic" processing such as  
254 discourse-level information integration and memory retrieval (Bhattasali et al., 2019; Diachek  
255 et al., 2020; Foudil et al., 2020; Mashal et al., 2014; Wehbe et al., 2020). Foudil et al. (2020),  
256 for example, showed that brain activation level in the Precuneus was modulated by storyline  
257 consistency, suggesting its role in discourse information integration. (Mashal et al., 2014) found  
258 that schizophrenia patients with impaired capability towards metaphor comprehension showed  
259 higher activity in the left Precuneus compared to healthy participants. Bhattasali et al. (2019)  
260 using a same naturalistic listening paradigm, showed that the right Precuneus was correlated  
261 with the retrieval of stored expressions. On the other hand, the Precuneus is also suggested to be  
262 a "processing core" that connects to the MTG and the AG and integrates multiple brain functions  
263 such as memory retrieval (Mar, 2011). Here the results show that the Precuneus represents  
264 story character information, and this is consistent with the idea that the Precuneus is crucial for  
265 discourse-level processing.

266 The Parahippocampal Gyrus has also been implicated in discourse-level language process-  
267 ing (Allendorfer et al., 2012; Wallentin et al., 2005). For example, Allendorfer et al. (2012) showed  
268 higher Parahippocampal Gyrus activity while participants were generating verbs silently for  
269 a given noun. Wallentin et al. (2005) found the right Parahippocampal Gyrus activity while

270 processing real motion sentences (*e.g.* “the man goes through the house”) and fictive motion sen-  
271 tences (*e.g.* “the trail goes through the house”). The decodability of story characters in the right  
272 Parahippocampal Gyrus further suggests that the search for antecedent involves discourse-level  
273 language processing. The Parahippocampal Gyrus, in previous studies, has also been reported  
274 relative to semantic memory retrieval and semantic verbal memory processing (Bartha et al.,  
275 2003). In Bartha et al.’s fMRI study, the subjects performed a semantic decision task while they  
276 heard spoken concrete nouns designating objects and made a decision on whether these objects  
277 were available in the supermarket and their costs compared to certain amounts. Bartha et al.  
278 observed activation in the Parahippocampal Gyrus, along with the medial temporal lobe and  
279 the inferior temporal lobe, and they inferred these brain regions’ relativity to semantic verbal  
280 memory processing. These results support the Parahippocampal Gyrus’s role for semantic  
281 language processing and discourse-level language processing as a brain region in the extended  
282 language network.

283         Apart from the Precuneus and the Parahippocampal Gyrus, we also identified a number of  
284 regions within the language network. The left AG has been suggested to support multimodal and  
285 multi-sensory associations that connect with brain regions for attention, episodic and semantic  
286 memory, and sentence level comprehension (Bonner et al., 2013; Humphreys et al., 2021; Price  
287 et al., 2015; Ramanan et al., 2018; Seghier, 2013). Using Transcranial Magnetic Stimulation  
288 (TMS), Branzi et al. (2021) found that the left AG is critical for integrating context-dependent  
289 information during language processing. Moreover, Davis & Yee (2019) suggested that the left  
290 AG’s connectivity to hippocampal regions underpins its essential role in processing thematic  
291 relations. The Frontal Pole is part of the deep track ventral pathway in the language network  
292 (Brauer et al., 2013) and is implicated for higher-level cognition processes, such as reasoning,  
293 episodic memory, and prospective memory (Tsujimoto et al., 2011). The left MFG is related to  
294 attention, working memory, and language processing (Briggs et al., 2021; Hazem et al., 2021).  
295 In a meta-analysis of fMRI studies by Wu et al. (2012), the LMFG had been found relevant for  
296 phonological and semantic processing in Chinese. The RITG has also been associated with  
297 language tasks such as metaphor and humor understanding (Ahrens et al., 2007; Bartolo et al.,  
298 2006) and noun processing (Crepaldi et al., 2013). To summarize, the brain network for resolving  
299 zero pronouns includes both the core language network and the extended language network *e.g.*  
300 the Precuneus and the Parahippocampal Gyrus. The involvement of brain regions related to

301 discourse-level language processing and memory retrieval supports our previous assumption  
302 that zero pronoun resolution requires the involvement of these brain regions. Incidentally, these  
303 brain regions have been found to be closely connected under resting state functional connectivity  
304 analysis (Xu et al., 2019, 2015).

## 305 **5 Conclusions**

306 This study examines the neural bases of zero pronoun processing in Chinese. By comparing  
307 fMRI BOLD responses for zero pronoun processing with that of non-zero reference processing  
308 during naturalistic listening, we show that zero pronoun resolution evokes increased activity  
309 in the LMTG, suggesting additional effort in the search for an antecedent. By decoding brain  
310 activity patterns for zero pronouns with different references, we show a network of activity,  
311 including the Precuneus and the Parahippocampal Gyrus that are outside the core language  
312 network.

## 313 **References**

- 314 Abraham, A., Pedregosa, F., Eickenberg, M., Gervais, P., Mueller, A., Kossaifi, J., ... Varoquaux,  
315 G. (2014). Machine learning for neuroimaging with scikit-learn. *Frontiers in neuroinformatics*, 8,  
316 14.
- 317 Ahrens, K., Liu, H.-L., Lee, C.-Y., Gong, S.-P., Fang, S.-Y., & Hsu, Y.-Y. (2007). Functional mri  
318 of conventional and anomalous metaphors in mandarin chinese. *Brain and language*, 100(2),  
319 163–171.
- 320 Allendorfer, J. B., Lindsell, C. J., Siegel, M., Banks, C. L., Vannest, J., Holland, S. K., & Szaflarski,  
321 J. P. (2012). Females and males are highly similar in language performance and cortical  
322 activation patterns during verb generation. *Cortex*, 48(9), 1218–1233.
- 323 Barbosa, P. P. (2011). Pro-drop and theories of pro in the minimalist program part 1: Consistent  
324 null subject languages and the pronominal-agr hypothesis. *Language and Linguistics Compass*,  
325 5(8), 551–570.
- 326 Barbosa, P. P. (2019). Pro as a minimal nP: Toward a unified approach to pro-drop. *Linguistic*  
327 *Inquiry*, 50(3), 487–526.

- 328 Bartha, L., Brenneis, C., Schocke, M., Trinka, E., Köylü, B., Trieb, T., ... others (2003). Medial  
329 temporal lobe activation during semantic language processing: fmri findings in healthy  
330 left-and right-handers. *Cognitive Brain Research*, 17(2), 339–346.
- 331 Bartolo, A., Benuzzi, F., Nocetti, L., Baraldi, P., & Nichelli, P. (2006). Humor comprehension and  
332 appreciation: an fmri study. *Journal of cognitive neuroscience*, 18(11), 1789–1798.
- 333 Bhattasali, S., Fabre, M., Luh, W.-M., Al Saied, H., Constant, M., Pallier, C., ... Hale, J. (2019).  
334 Localising memory retrieval and syntactic composition: an fmri study of naturalistic language  
335 comprehension. *Language, Cognition and Neuroscience*, 34(4), 491–510.
- 336 Bi, R. A., & Jenks, P. (2019). Pronouns, null arguments, and ellipsis in mandarin chinese. In  
337 M. Espinal, E. Castroviejo, M. Leonetti, L. McNally, & C. Real-Puigdollers (Eds.), *Proceedings of*  
338 *sinn und bedeutung* 23 (Vol. 1, pp. 127–142). Universitat Autònoma de Barcelona.
- 339 Bonner, M. F., Peelle, J. E., Cook, P. A., & Grossman, M. (2013). Heteromodal conceptual  
340 processing in the angular gyrus. *Neuroimage*, 71, 175–186.
- 341 Branzi, F. M., Pobric, G., Jung, J., & Lambon Ralph, M. A. (2021). The left angular gyrus is  
342 causally involved in context-dependent integration and associative encoding during narrative  
343 reading. *Journal of Cognitive Neuroscience*, 1–14.
- 344 Brauer, J., Anwender, A., Perani, D., & Friederici, A. D. (2013). Dorsal and ventral pathways in  
345 language development. *Brain and language*, 127(2), 289–295.
- 346 Briggs, R. G., Lin, Y.-H., Dadario, N. B., Kim, S. J., Young, I. M., Bai, M. Y., ... others (2021).  
347 Anatomy and white matter connections of the middle frontal gyrus. *World Neurosurgery*.
- 348 Brodbeck, C., Gwilliams, L., & Pylkkänen, L. (2016). Language in context: Meg evidence for  
349 modality-general and -specific responses to reference resolution. *eNeuro*, 3, e0145-16.2016  
350 1–16.
- 351 Brodbeck, C., & Pylkkänen, L. (2017). Language in context: Characterizing the comprehension  
352 of referential expressions with meg. *NeuroImage*, 147, 447-460.
- 353 Cai, Q., & Brysbaert, M. (2010). Subtlex-ch: Chinese word and character frequencies based on  
354 film subtitles. *Plos ONE*, 5, e10729.



- 355 Cox, R. W. (1996). Afni: software for analysis and visualization of functional magnetic resonance  
356 neuroimages. *Computers and Biomedical research*, 29(3), 162–173.
- 357 Crepaldi, D., Berlingeri, M., Cattinelli, I., Borghese, N. A., Luzzatti, C., & Paulesu, E. (2013).  
358 Clustering the lexicon in the brain: a meta-analysis of the neurofunctional evidence on noun  
359 and verb processing. *Frontiers in human neuroscience*, 7, 303.
- 360 Davis, C. P., & Yee, E. (2019). Features, labels, space, and time: Factors supporting taxonomic  
361 relationships in the anterior temporal lobe and thematic relationships in the angular gyrus.  
362 *Language, Cognition and Neuroscience*, 34(10), 1347–1357.
- 363 Diachek, E., Blank, I., Siegelman, M., Affourtit, J., & Fedorenko, E. (2020). The domain-general  
364 multiple demand (md) network does not support core aspects of language comprehension: a  
365 large-scale fmri investigation. *Journal of Neuroscience*, 40(23), 4536–4550.
- 366 Dronkers, N. F., et al. (2011). The neural architecture of the language comprehension network:  
367 converging evidence from lesion and connectivity analyses. *Frontiers in systems neuroscience*, 5,  
368 1.
- 369 Fedorenko, E., Behr, M. K., & Kanwisher, N. (2011). Functional specificity for high-level  
370 linguistic processing in the human brain. *Proceedings of the National Academy of Sciences*, 108(39),  
371 16428–16433.
- 372 Ferstl, E. C., Neumann, J., Bogler, C., & Von Cramon, D. Y. (2008). The extended language  
373 network: a meta-analysis of neuroimaging studies on text comprehension. *Human brain  
374 mapping*, 29(5), 581–593.
- 375 Foudil, S.-A., Kwok, S. C., & Macaluso, E. (2020). Context-dependent coding of temporal  
376 distance between cinematic events in the human precuneus. *Journal of Neuroscience*, 40(10),  
377 2129–2138.
- 378 Hammer, A., Goebel, R., Schwarzbach, J., Münte, T. F., & Jansma, B. M. (2007). When sex meets  
379 syntactic gender on a neural basis during pronoun processing. *Brain Research*, 1146, 185-198.
- 380 Hammer, A., Jansma, B. M., Tempelmann, C., & Münte, T. F. (2011). Neural mechanisms of  
381 anaphoric reference revealed by fMRI. *Frontiers in Psychology*, 2, 1-9.

- 382 Hazem, S. R., Awan, M., Lavrador, J. P., Patel, S., Wren, H. M., Lucena, O., ... others (2021).  
383 Middle frontal gyrus and area 55b: Perioperative mapping and language outcomes. *Frontiers*  
384 *in Neurology*, 12, 194.
- 385 Heim, S., Opitz, B., & Friederici, A. D. (2002). Broca's area in the human brain is involved in  
386 the selection of grammatical gender for language production: Evidence from event-related  
387 functional magnetic resonance imaging. *Neuroscience Letters*, 328, 101–104.
- 388 Huang, C.-T. J. (1989). Pro-drop in Chinese: A generalized control theory. In O. Jaeggli & K. Safir  
389 (Eds.), *The null subject parameter* (p. 185-214). Springer.
- 390 Humphreys, G. F., Ralph, M. A. L., & Simons, J. S. (2021). A unifying account of angular gyrus  
391 contributions to episodic and semantic cognition. *Trends in Neurosciences*.
- 392 Kun, S. (2019). The integration functions of topic chains in chinese discourse. *Acta Linguistica*  
393 *Asiatica*, 9(1), 29–57.
- 394 Kundu, P., Inati, S. J., Evans, J. W., Luh, W.-M., & Bandettini, P. A. (2012). Differentiating bold  
395 and non-bold signals in fmri time series using multi-echo epi. *Neuroimage*, 60(3), 1759–1770.
- 396 Li, C. N., & Thompson, S. A. (1976). Subject and topic: A new typology. In C. N. Li (Ed.), *Subject*  
397 *and topic* (p. 457-89). New York, USA: Academic Press.
- 398 Li, J., Wang, S., Luh, W.-M., Pylkkänen, L., Yang, Y., & Hale, J. (2021). Cortical processing of  
399 reference in language revealed by computational models. *bioRxiv* 2020.11.24.396598.
- 400 Li, P., Jin, Z., & Tan, L. H. (2004). Neural representations of nouns and verbs in chinese: an fmri  
401 study. *Neuroimage*, 21(4), 1533–1541.
- 402 Li, W. (2004). Topic chains in chinese discourse. *Discourse Processes*, 37(1), 25–45.
- 403 Mar, R. A. (2011). The neural bases of social cognition and story comprehension. *Annual review*  
404 *of psychology*, 62, 103–134.
- 405 Mashal, N., Vishne, T., & Laor, N. (2014). The role of the precuneus in metaphor comprehension:  
406 evidence from an fmri study in people with schizophrenia and healthy participants. *Frontiers*  
407 *in human neuroscience*, 8, 818.

- 408 Matchin, W., & Hickok, G. (2020). The cortical organization of syntax. *Cerebral Cortex*, 30(3),  
409 1481–1498.
- 410 Matchin, W., Sprouse, J., & Hickok, G. (2014). A structural distance effect for backward anaphora  
411 in Broca’s area: An fMRI study. *Brain and Language*, 138, 1-11.
- 412 Miceli, G., Turriziani, P., Caltagirone, C., Capasso, R., Tomaiuolo, F., & Caramazza, A. (2002).  
413 The neural correlates of grammatical gender: An fMRI investigation. *Journal of Cognitive*  
414 *Neuroscience*, 14, 618-628.
- 415 Neeleman, A., & Szendrői, K. (2007). Radical pro drop and the morphology of pronouns.  
416 *Linguistic Inquiry*, 38(4), 671–714.
- 417 Nieuwland, M. S., Petersson, K. M., & Van Berkum, J. J. (2007). On sense and reference:  
418 Examining the functional neuroanatomy of referential processing. *NeuroImage*, 37(3), 993–  
419 1004.
- 420 Pedregosa, F., Varoquaux, G., Gramfort, A., Michel, V., Thirion, B., Grisel, O., ... others (2011).  
421 Scikit-learn: Machine learning in python. *the Journal of machine Learning research*, 12, 2825–2830.
- 422 Peirce, J. W. (2007). Psychopy—psychophysics software in python. *Journal of neuroscience methods*,  
423 162(1-2), 8–13.
- 424 Penny, W., Friston, K., Ashburner, J., Kiebel, S., & Nichols, T. (2011). *Statistical parametric mapping:*  
425 *The analysis of functional brain images*. Academic Press.
- 426 Price, A. R., Bonner, M. F., Peelle, J. E., & Grossman, M. (2015). Converging evidence for the  
427 neuroanatomic basis of combinatorial semantics in the angular gyrus. *Journal of Neuroscience*,  
428 35(7), 3276–3284.
- 429 Ramanan, S., Piguet, O., & Irish, M. (2018). Rethinking the role of the angular gyrus in  
430 remembering the past and imagining the future: the contextual integration model. *The*  
431 *Neuroscientist*, 24(4), 342–352.
- 432 Santi, A., & Grodzinsky, Y. (2012). Broca’s area and sentence comprehension: A relationship  
433 parasitic on dependency, displacement or predictability? *Neuropsychologia*, 50, 821-832.

- 434 Seghier, M. L. (2013). The angular gyrus: multiple functions and multiple subdivisions. *The*  
435 *Neuroscientist*, 19(1), 43–61.
- 436 Shi, D. (1993). The nature of topic comment constructions and topic chains.
- 437 Song, Z. (2005). A comparative study of subject pro-drop in old chinese and modern chinese.  
438 *University of Pennsylvania Working Papers in Linguistics*, 10(2), 18.
- 439 Tsujimoto, S., Genovesio, A., & Wise, S. P. (2011). Frontal pole cortex: encoding ends at the end  
440 of the endbrain. *Trends in cognitive sciences*, 15(4), 169–176.
- 441 Wallentin, M., Østergaard, S., Lund, T. E., Østergaard, L., & Roepstorff, A. (2005). Concrete  
442 spatial language: See what i mean? *Brain and language*, 92(3), 221–233.
- 443 Wehbe, L., Blank, I. A., Shain, C., Futrell, R., Levy, R., von der Malsburg, T., ... Fedorenko,  
444 E. (2020). Incremental language comprehension difficulty predicts activity in the language  
445 network but not the multiple demand network. *bioRxiv*.
- 446 Wu, C.-Y., Ho, M.-H. R., & Chen, S.-H. A. (2012). A meta-analysis of fmri studies on chinese  
447 orthographic, phonological, and semantic processing. *Neuroimage*, 63(1), 381–391.
- 448 xiaowangzi.org. (2021). 小王子网站. <http://www.xiaowangzi.org/>. (Accessed: 2021-04-03)
- 449 Xiong, Y., & Newman, S. (2021). Both activation and deactivation of functional networks support  
450 increased sentence processing costs. *Neuroimage*, 225, 117475.
- 451 Xu, J., Lyu, H., Li, T., Xu, Z., Fu, X., Jia, F., ... Hu, Q. (2019). Delineating functional segregations of  
452 the human middle temporal gyrus with resting-state functional connectivity and coactivation  
453 patterns. *Human brain mapping*, 40(18), 5159–5171.
- 454 Xu, J., Wang, J., Fan, L., Li, H., Zhang, W., Hu, Q., & Jiang, T. (2015). Tractography-based  
455 parcellation of the human middle temporal gyrus. *Scientific Reports*, 5(1), 1–13.
- 456 Zhang, Y., & Clark, S. (2011). Syntactic processing using the generalized perceptron and  
457 beam search. *Computational Linguistics*, 37(1). Retrieved from [http://aclweb.org/anthology/](http://aclweb.org/anthology/J11-1005)  
458 J11-1005 doi: 10.1162/coli\_a\_00037

459 **A Supplemental Material**

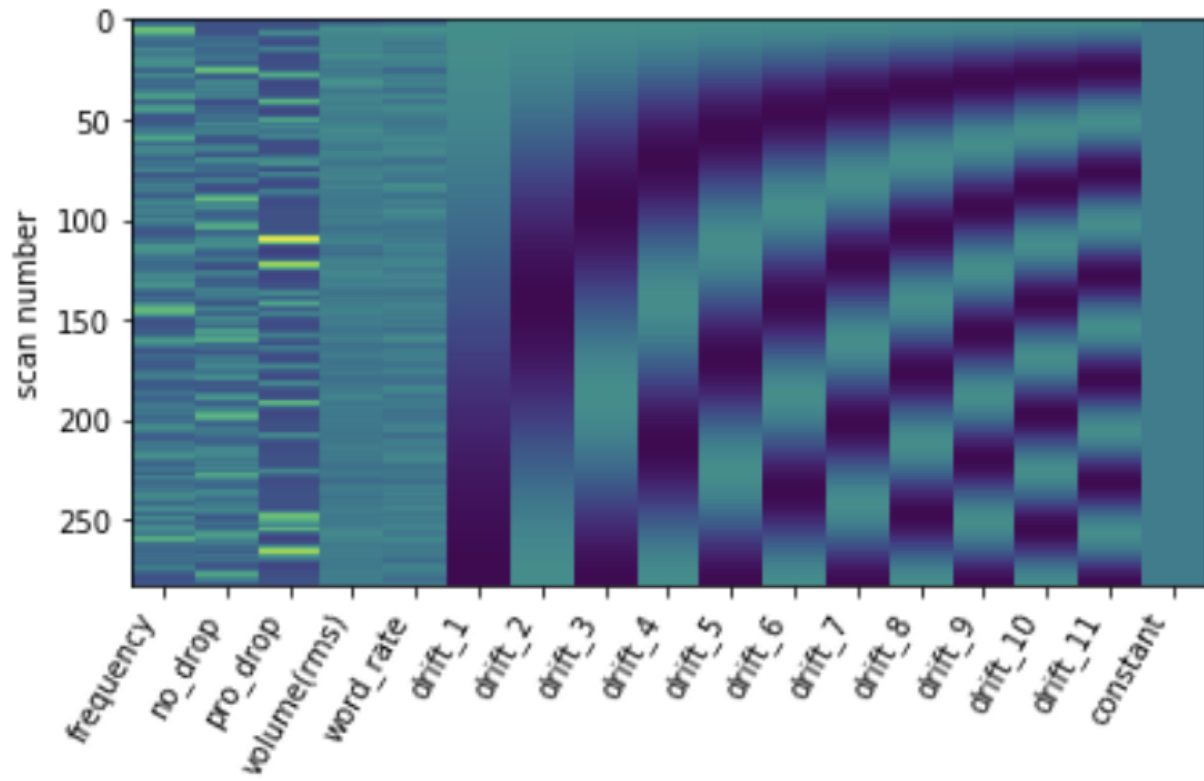

**Supplementary Figure 4:** GLM analysis design matrix

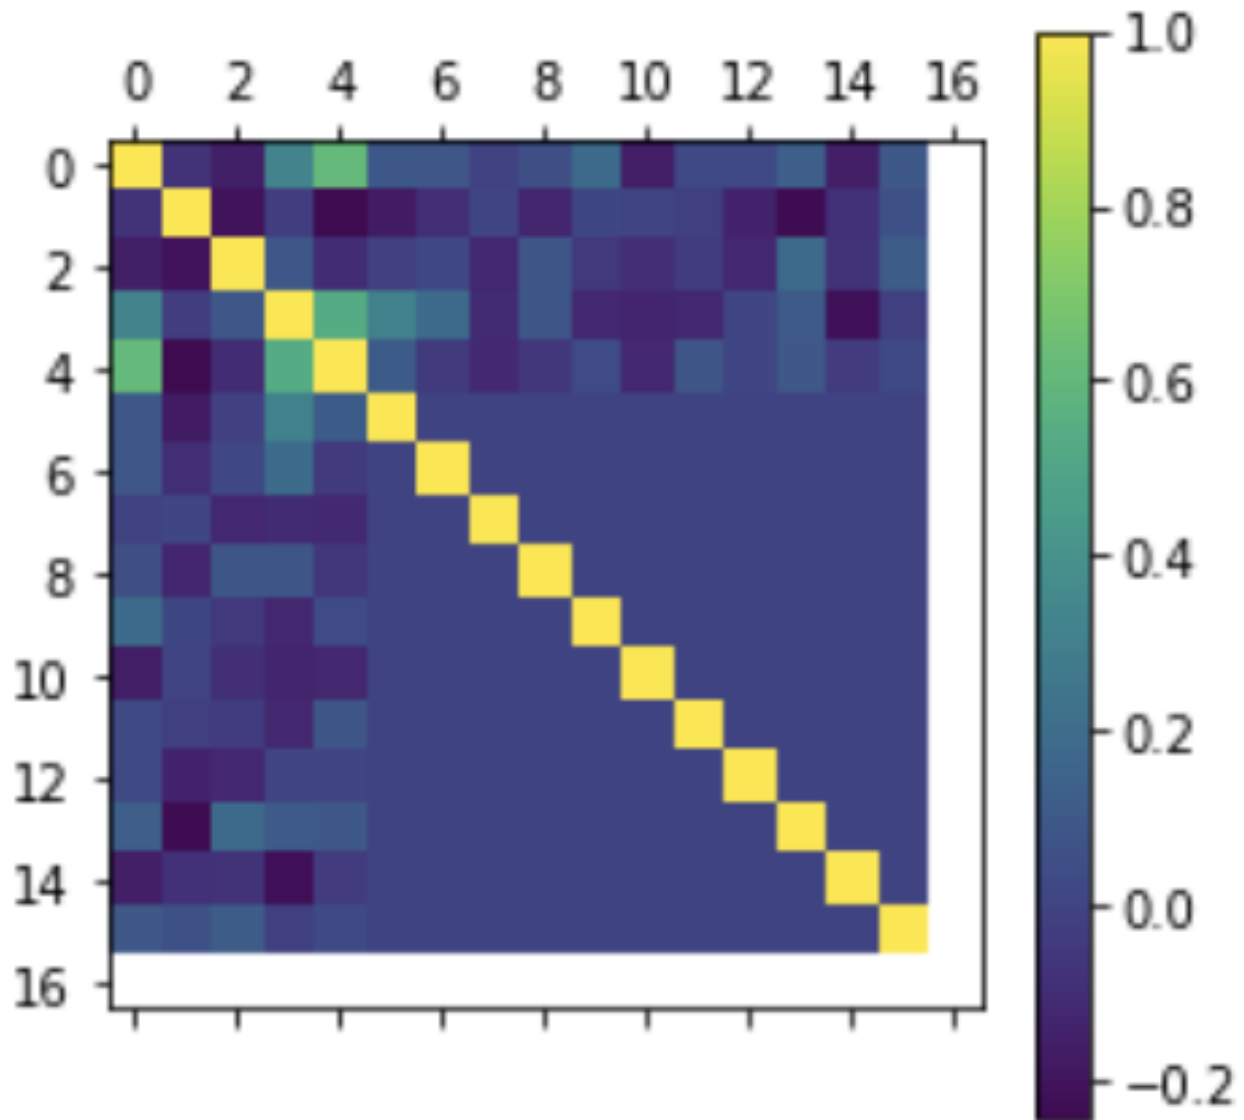

**Supplementary Figure 5:** Pearson's correlation coefficients between each predictor, the order of regressors are the same as shown in the design matrix in Figure 4
